# Supplementary material for: Lauric acid triggered in situ surface modification and phase selectivity of calcium carbonate: its application as an oil sorbent
Source: Royal Society of Chemistry journal article supplement (doi:10.1039/c2jm30778b), 2012-01-01
Supplement: c2jm30778b.pdf [file c2jm30778b.pdf]

## Supporting Materials for Lauric Acid Triggered *in-situ* Surface Modification and Phase Selectivity of Calcium Carbonate: Its Application as an Oil Sorbent

Arpita Sarkar, Amit K. Ghosh and Samiran Mahapatra\*

Unilever R&D, 64 Main Road, Whitefield, Bangalore 560066, India.

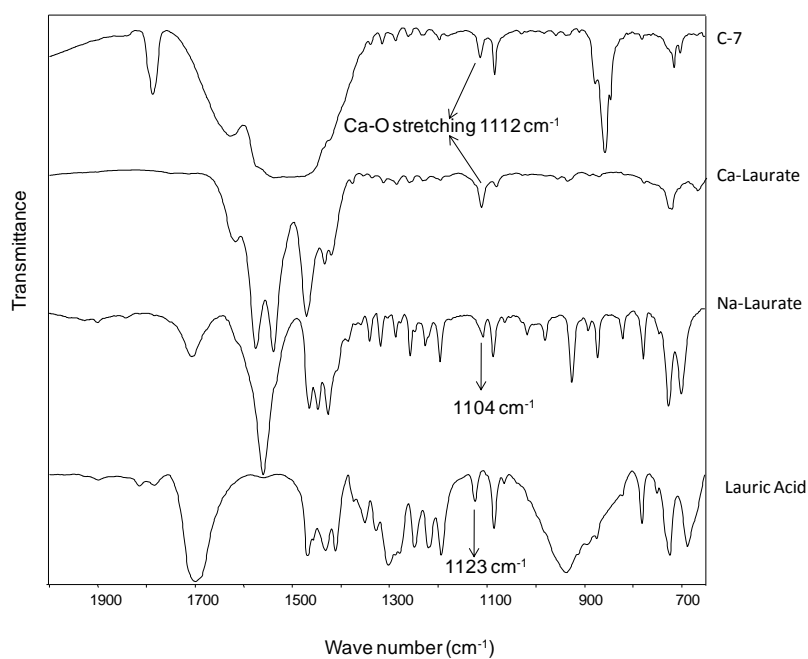

**Figure S-1.** FT IR spectra of Lauric acid, Na-Laurate, Ca-Laurate and Sample C-7, CaCO<sub>3</sub> synthesized in the presence of Lauric acid.

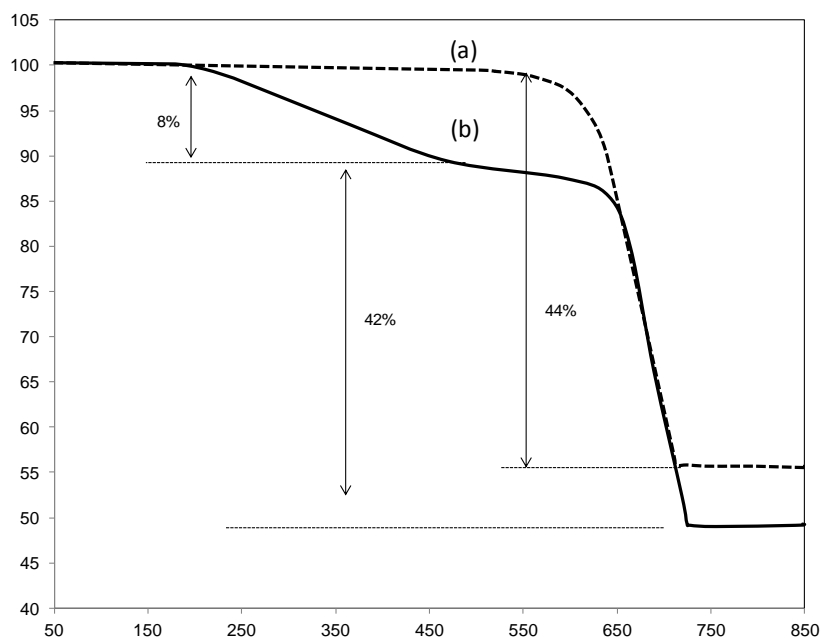

**Figure S-2.** a) TGA curve of Calcite sample synthesized in the absence of any additive (C-1) , and (b) TGA profile of  $\text{CaCO}_3$  synthesized in the presence of Lauric acid (C-6,  $\text{Ca}^{2+}$ :Lauric acid 1:0.05)

**Table S-3.** Percentage Weight Loss different  $\text{CaCO}_3$  samples at 250-600°C

| Sample | $\text{Ca}^{2+}$ : Lauric acid<br>(mole ratio) | Wt. Loss at 250-<br>600°C(%) |
|--------|------------------------------------------------|------------------------------|
| C-1    | 1 : 0                                          | Nil                          |
| C-6    | 1 : 0.05                                       | 8                            |
| C-7    | 1 : 0.1                                        | 15                           |

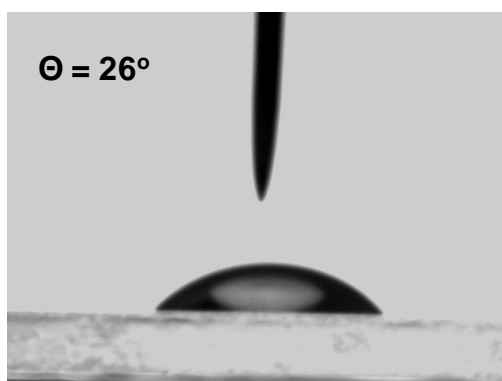

**Figure S-4.** Contact angle formed by a drop of sunflower oil on a substrate coated with sample C-5 ( $\text{Ca}^{2+}$ : Lauric acid mole ratio 1:0.01)

**Table S-5.** Oil absorption efficiency of various hydrophobic CaCO<sub>3</sub> samples from oil-water mixture (1:10)\*

| Sample | Ca <sup>2+</sup> : Lauric acid<br>(mole ratio) | Wt. of water<br>recovered (g) | Oil absorption<br>efficiency (%) |
|--------|------------------------------------------------|-------------------------------|----------------------------------|
| C-2    | 1: 0.001                                       | 17                            | 85                               |
| C-4    | 1:0.0075                                       | 19                            | 95                               |
| C-6    | 1:0.05                                         | 19.7                          | 98.5                             |

\*Total volume of oil-water mixture was 20ml. 2g CaCO<sub>3</sub> samples were added in each case.
